# Supplementary material
Source: PubMed Central journal article supplement (PMC6363896)

Supplemental Material for:

**Quality of life and symptom burden among myeloproliferative neoplasm patients: Do symptoms impact quality of life?**

Blake T. Lenglais, et al.

- Supplemental Table 1. Study group characteristics by MPN disease subgroup
- Supplemental Figure 1. Individual symptom severity, prevalence, and correlation with quality of life for each MPN disease subgroup.
- Supplemental Figure 2. Summary measure impact on quality of life: Mean of the (x) most severe symptom scores for the group
- Supplemental Figure 3. Summary measure impact on quality of life: Mean of the (x) most severe symptom scores for each patient
- Supplemental Figure 4. Summary measure impact on quality of life: Total number of symptoms at/above each symptom severity threshold
- Supplemental Figure 5. Summary measure impact on quality of life: At least one symptom at/above each symptom severity threshold

**Supplemental Table 1. Study Group Characteristics by MPN Disease Subgroup**

|                                                 | ET<br>(N=625) | PV<br>(N=456) | MF<br>(N=335)  | Overall<br>(N=1416) | <i>P</i>             |
|-------------------------------------------------|---------------|---------------|----------------|---------------------|----------------------|
| Age, mean (SD)                                  | 57.2 (15.1)   | 60.4 (13.0)   | 58.5 (11.7)    | 58.5 (13.8)         | <0.001 <sup>1</sup>  |
| Sex, n (%)                                      |               |               |                |                     | <0.001 <sup>2</sup>  |
| Female                                          | 383 (62.5%)   | 191 (42.4%)   | 165 (49.3%)    | 739 (52.9%)         |                      |
| Male                                            | 230 (37.5%)   | 259 (57.6%)   | 170 (50.7%)    | 659 (47.1%)         |                      |
| QLQ-C30 GHS/QoL, mean (SD)                      | 70.0 (21.6)   | 66.7 (22.4)   | 59.2 (24.1)    | 66.4 (22.9)         | <0.001 <sup>3*</sup> |
| MPN-SAF TSS, mean (SD)                          | 1.7 (1.5)     | 1.9 (1.6)     | 2.6 (1.7)      | 2.0 (1.6)           | <0.001 <sup>1*</sup> |
| Duration of MPN diagnosis, median years (range) | 5 (0.0-27.0)  | 6 (0.0-36.0)  | 5.5 (0.0-43.0) | 5 (0.0-43.0)        | 0.12 <sup>3</sup>    |

<sup>1</sup>ANOVA <sup>2</sup>Chi-Square <sup>3</sup>Kruskal Wallis \* Linear regression model adjusting for age and sex

**Supplemental Figure 1. Individual Symptom Severity, Prevalence, and Correlation with Quality of Life by MPN Subgroup**

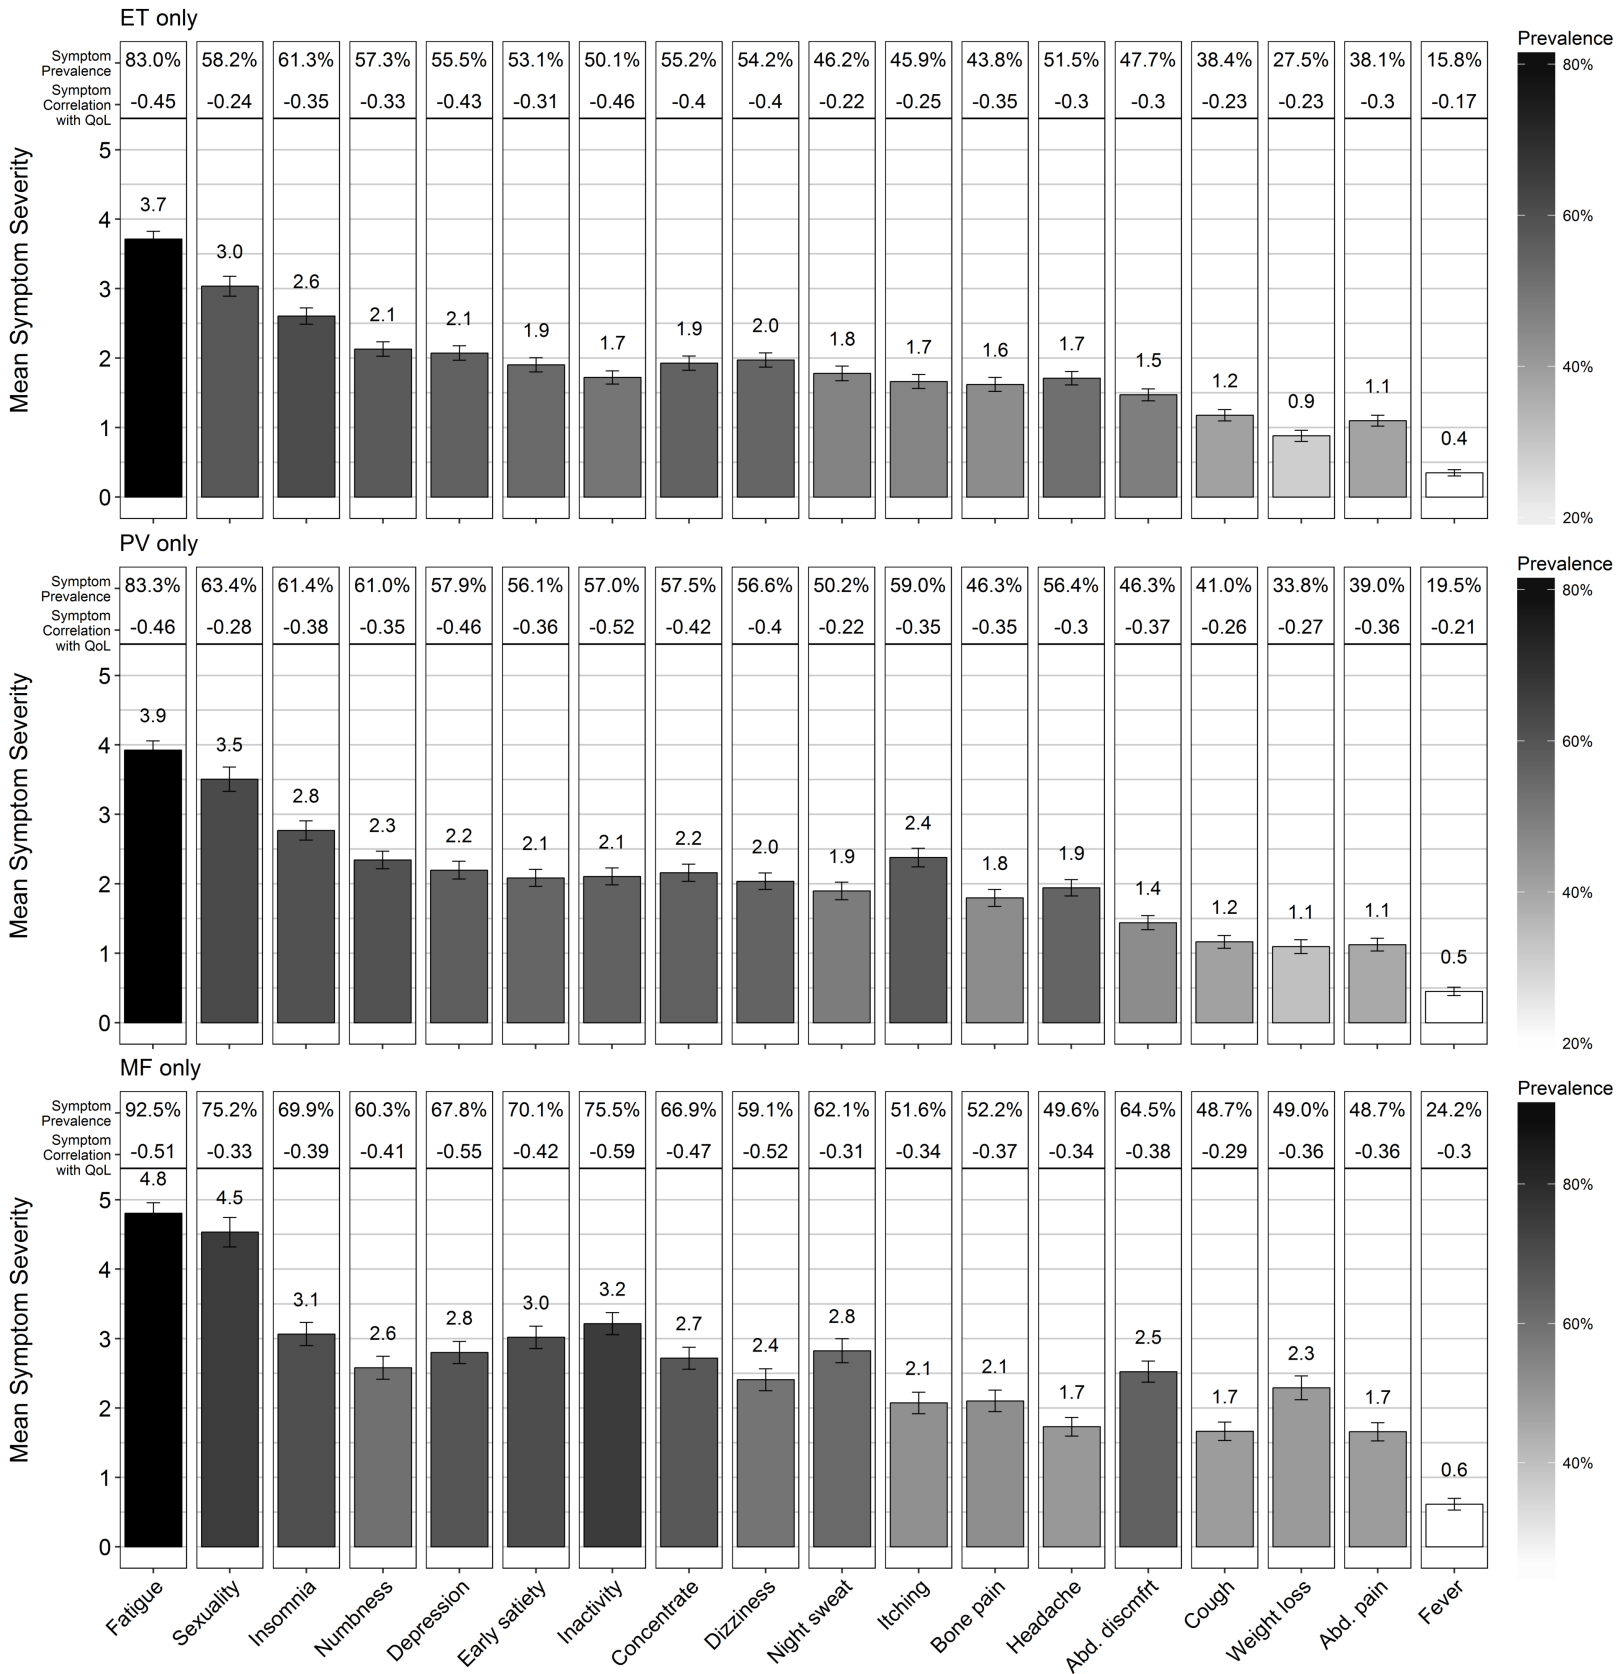

Symptom severity was measured as 0 (absent) to 10 (worst imaginable) using the MPN Symptom Assessment Form. Prevalence was defined as a symptom score greater than or equal to 1. Pearson correlations shown are between each symptom and quality of life as measured by the Global Health Status/Quality of Life scale of the European Organization for Research and Treatment of Cancer Quality of Life Questionnaire Core 30.

**Supplemental Figure 2. Summary measure impact on quality of life: Mean of the (x) most severe symptom scores for the group**

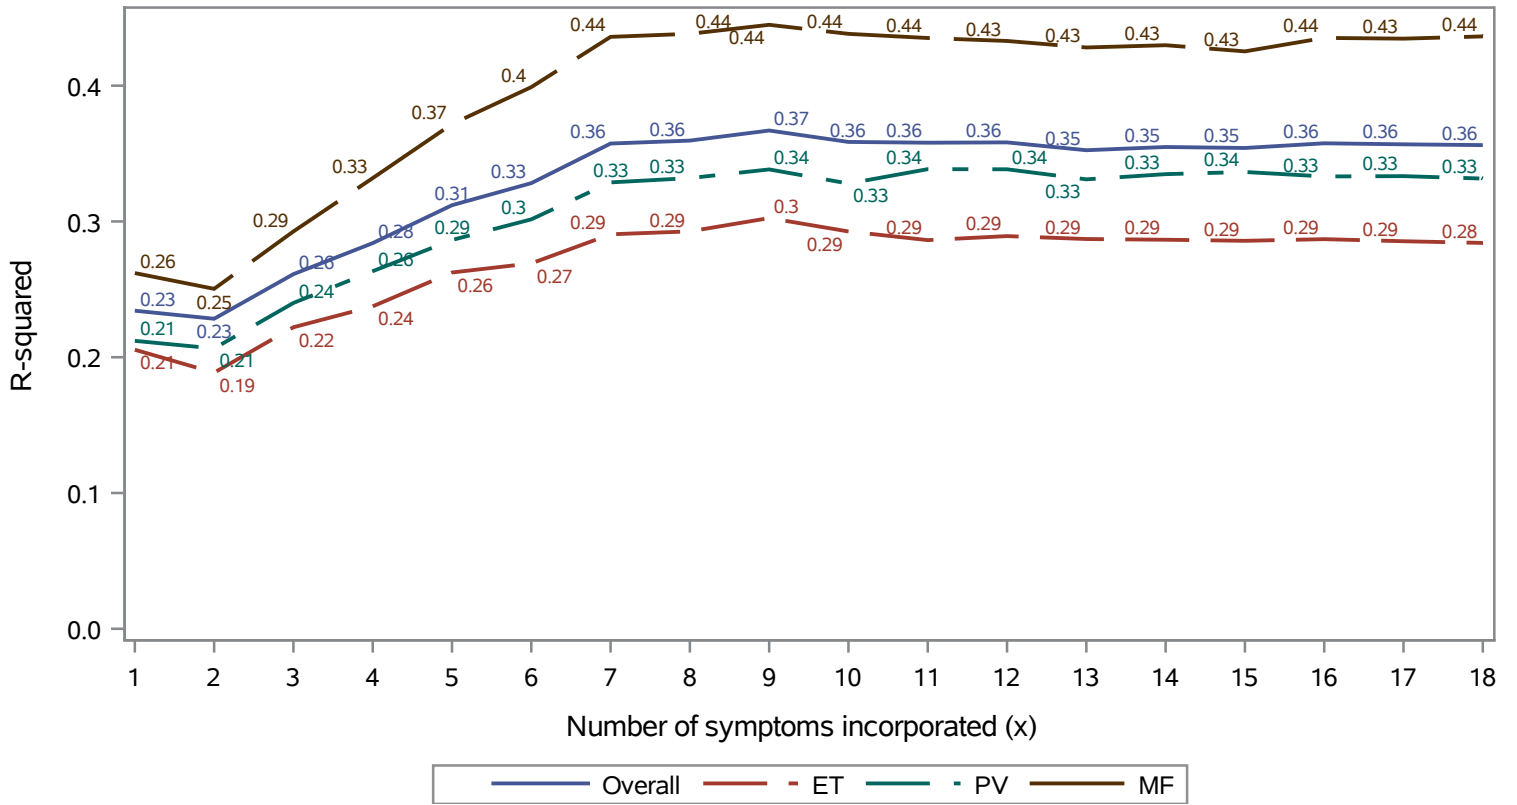

**Supplemental Figure 3. Summary measure impact on quality of life: Mean of the (x) most severe symptom scores for each patient**

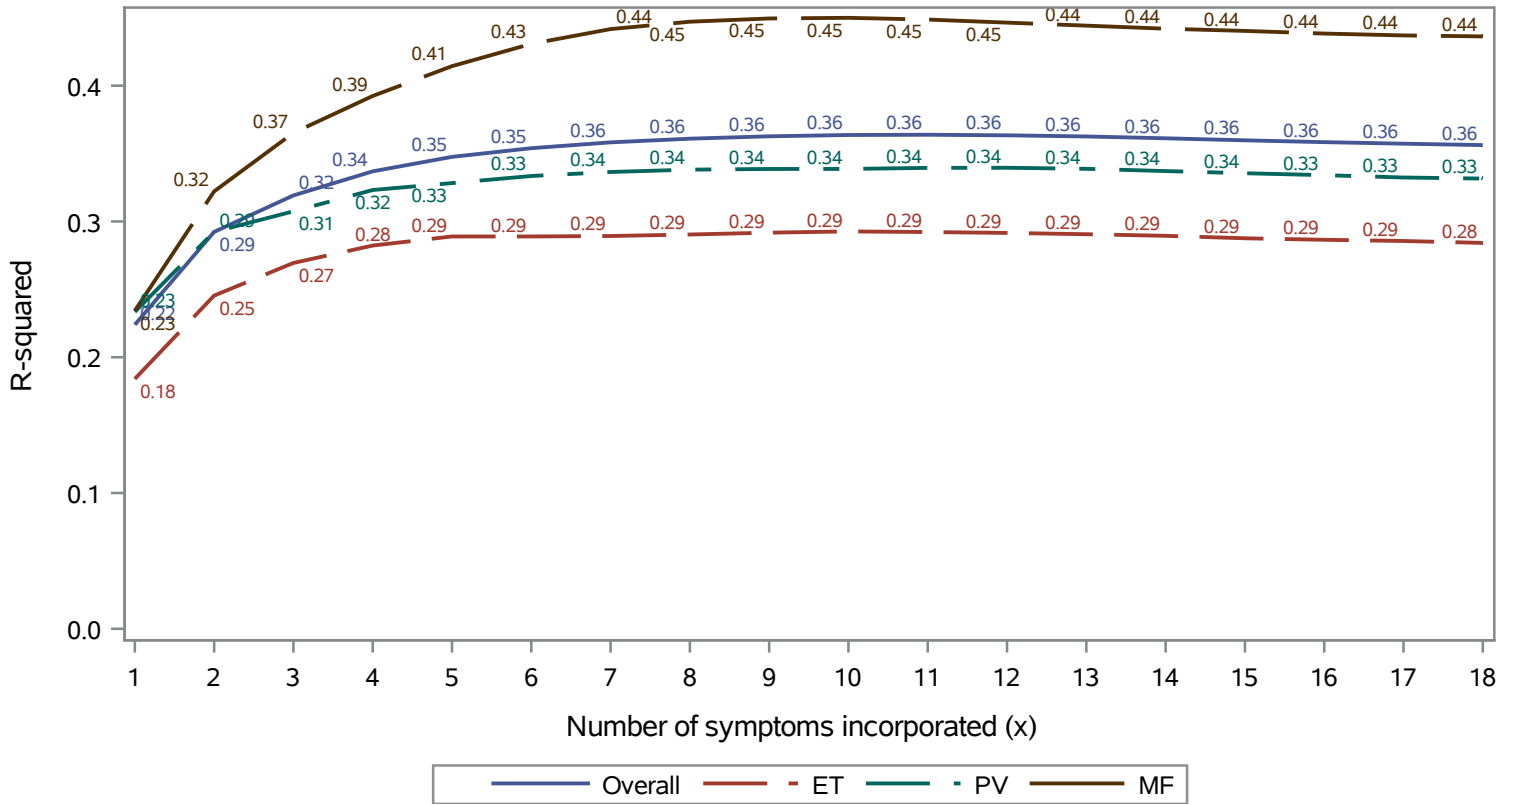

**Supplemental Figure 4. Summary measure impact on quality of life: Total number of symptoms at/above each symptom severity threshold**

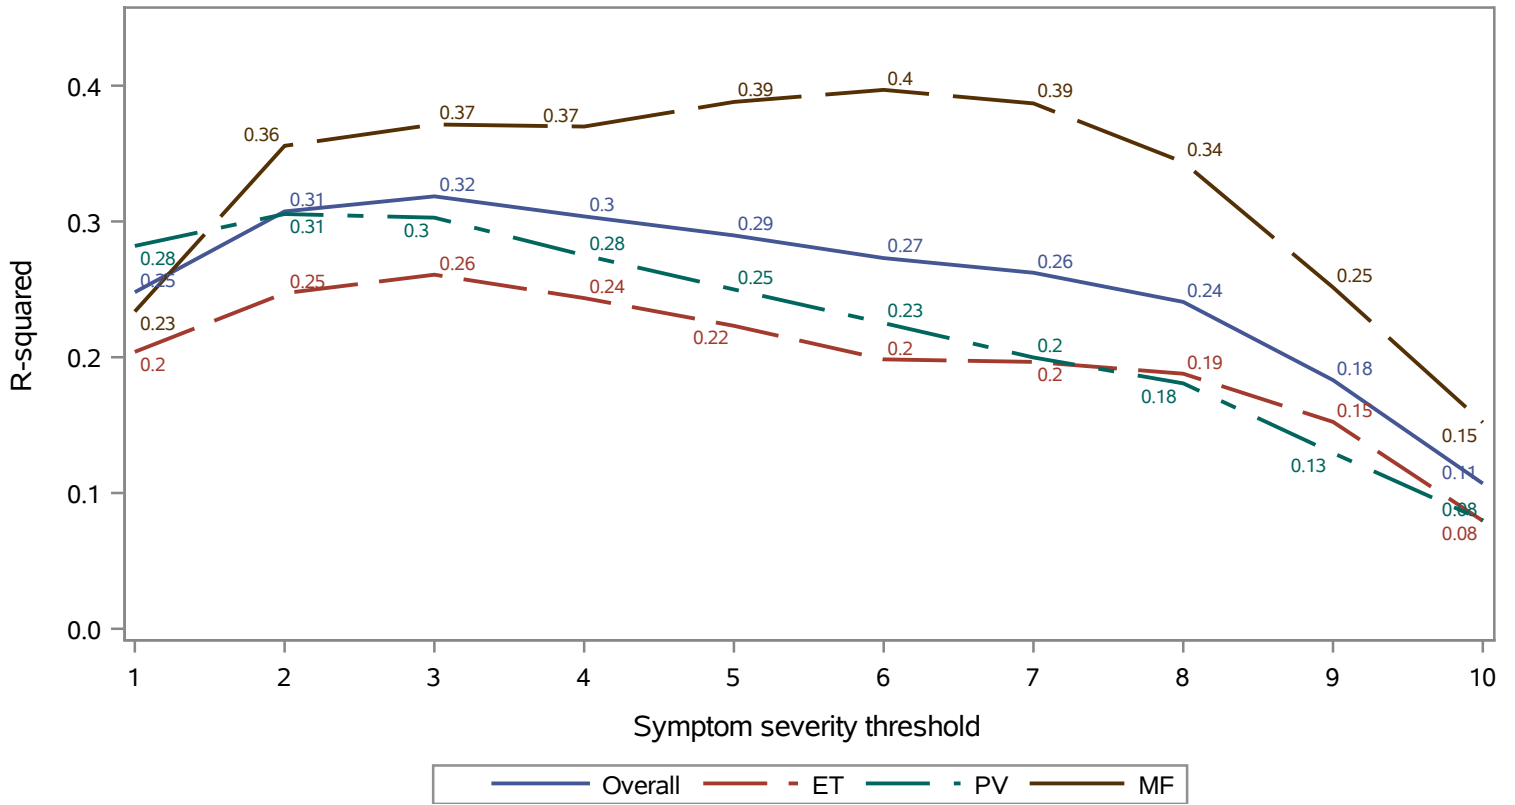

**Supplemental Figure 5. Summary measure impact on quality of life: At least one symptom at/above each symptom severity threshold**

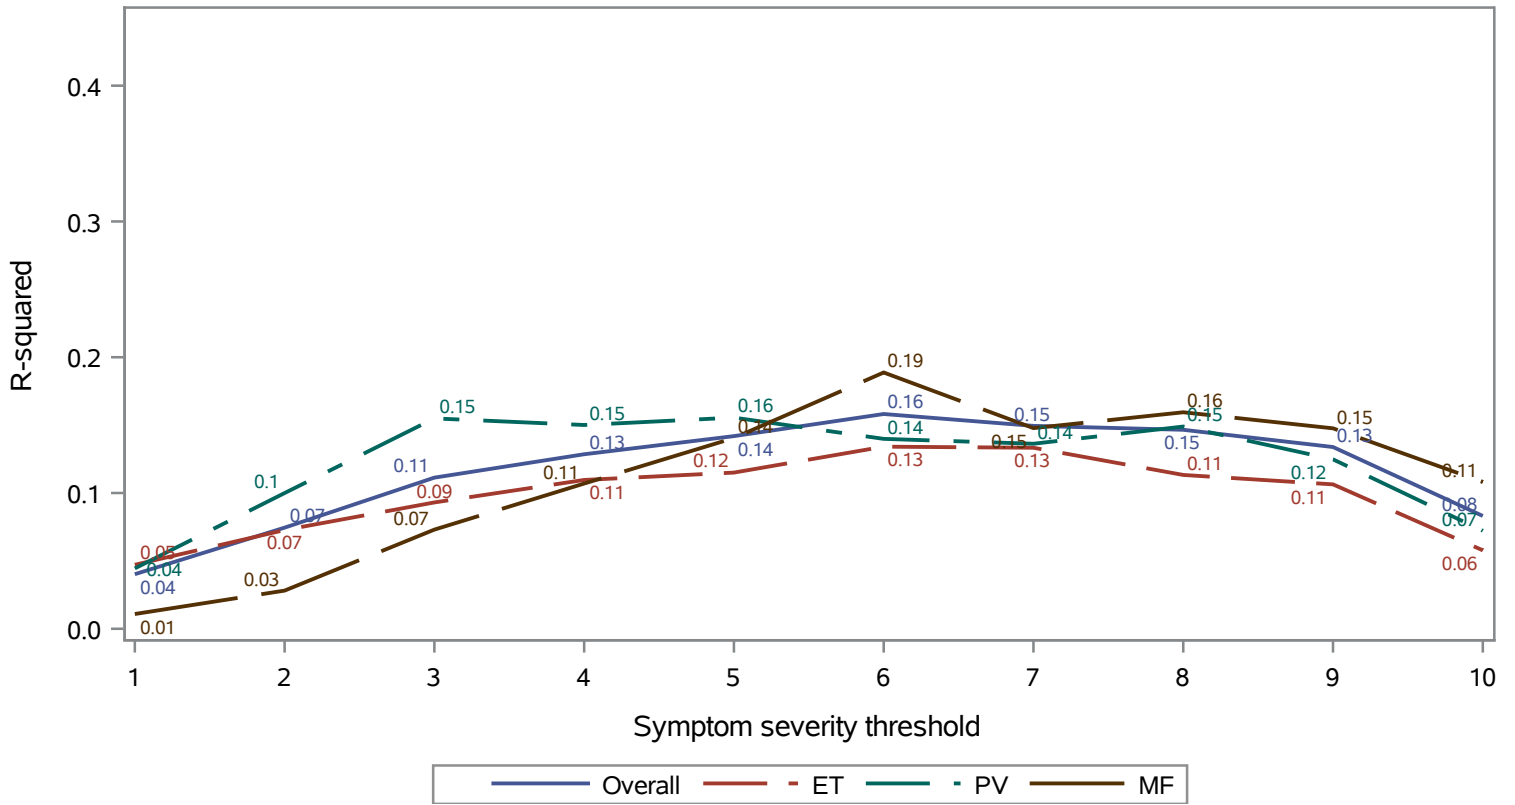

Supplement: NIHMS1515659-supplement-Supplementary_Material.pdf [file NIHMS1515659-supplement-Supplementary_Material.pdf]
